# Supplementary material for: Enhancement of the affinity of 2′-O-Me-oligonucleotides for complementary RNA by incorporating a stereoregulated boranophosphate backbone
Source: Royal Society of Chemistry journal article supplement (doi:10.1039/c4ra11335g), 2014-11-28

## Supplementary Information

### Enhancement of affinity of 2'-*O*-Me-oligonucleotides for complementary RNA by incorporating a stereoregulated boranophosphate backbone

*Yohei Nukaga,<sup>a,b,c</sup> Tetsuhiko Takemura,<sup>b</sup> Naoki Iwamoto,<sup>b</sup> Natsuhisa Oka<sup>d</sup> and Takeshi Wada<sup>\*a,b,c</sup>*

<sup>a</sup>Department of Medicinal and Life Sciences, Faculty of Pharmaceutical Sciences, Tokyo University of Science, 2641 Yamazaki, Noda, Chiba 278-8510, Japan

<sup>b</sup>Department of Medical Genome Sciences, Graduate School of Frontier Sciences, The University of Tokyo, Bioscience Building 702, Kashiwa, Chiba 277-8562, Japan

<sup>c</sup>Core Research for Evolutional Science and Technology (CREST), Japan Science and Technology Agency (JST), 7, Gbancho, Chiyoda-ku, Tokyo, 102-0076, Japan

<sup>d</sup>Department of Chemistry and Biomolecular Science, Faculty of Engineering, Gifu University, Yanagido 1-1, Gifu 501-1193, Japan

### General information.

All NMR spectra were recorded on a Varian Mercury 300. <sup>1</sup>H NMR spectra were obtained at 300 MHz with tetramethylsilane (TMS) ( $\delta$  0.0) as an internal standard in CDCl<sub>3</sub>. <sup>13</sup>C NMR spectra were obtained at 75.5 MHz with CDCl<sub>3</sub> as an internal standard ( $\delta$  77.0) in CDCl<sub>3</sub>. <sup>31</sup>P NMR spectra were obtained at 121.5 MHz with 85% H<sub>3</sub>PO<sub>4</sub> ( $\delta$  0.0) as an external standard. Silica gel column chromatography was carried out using Kanto silica gel 60N (spherical, neutral, 63–210  $\mu$ m) or NH Silica gel (Fuji Silysia Chemical). Analytical TLC was performed on Merck Kieselgel 60-F254 plates. Dry organic solvents were prepared by appropriate procedures prior to use. The other organic solvents were reagent grade and used as received. Manual solid-phase synthesis was performed by using a glass filter (10 mm  $\times$  50 mm) with a stopper at the top and a stopcock at the bottom as a reaction vessel. Highly cross-linked polystyrene (HCP) were purchased from Applied Biosystems. UV quantitation at 260 nm for 2'-O-Me-PB-ORNs was performed with a JASCO V-550 UV/VIS spectrophotometer. RP-HPLC was carried out using a  $\mu$ Bondasphere (C18) (100  $\text{Å}$ , 3.9 mm  $\times$  150 mm) (Waters). Melting curves of ORN duplexes were recorded on a Shimadzu UV-1650PC UV-Visible spectrophotometer.

### (Sp)-U-Monomer [(Sp)-5].

5'-O-MMTr-2'-O-Me-uridine (0.53 g, 1.0 mmol) was dried by repeated coevaporations with dry pyridine and dry toluene and dissolved in freshly distilled THF (5.0 mL). Triethylamine (1.0 mL, 7.0 mmol) and a 0.167 M solution of the 2-chloro-1,3,2-oxazaphospholidine derivative L-3 in freshly distilled THF (12 mL, 2.0 mmol) were successively added at  $-78$  °C, and the mixture was stirred for 4 h at rt. The mixture was then diluted with CHCl<sub>3</sub> (100 mL) and washed with a saturated NaHCO<sub>3</sub> aqueous solutions (3  $\times$  100 mL). The organic layer was dried over Na<sub>2</sub>SO<sub>4</sub>, filtered and concentrated under reduced pressure. The residue was then purified by silica gel column chromatography [NH silica gel, hexane–ethyl acetate–triethylamine (30:70:0.05, v/v/v)]. The fractions containing (Sp)-5 were collected, washed with a saturated NaHCO<sub>3</sub> aqueous solution (100 mL), dried over Na<sub>2</sub>SO<sub>4</sub>, filtered and concentrated to dryness under reduced pressure to afford (Sp)-5 (0.44 g, 0.59 mmol, 59%) as a colorless foam. <sup>1</sup>H NMR (CDCl<sub>3</sub>)  $\delta$  9.16 (1H, brs), 8.08 (1H, d,  $J$  = 7.8 Hz), 7.42–7.22 (17H, m), 6.81 (2H, d,  $J$  = 9.0 Hz), 6.01 (1H, d,  $J$  = 2.1 Hz), 5.20 (1H, d,  $J$  = 8.4 Hz), 4.86–4.79 (1H, m), 4.28 (1H, d,  $J$  = 7.5 Hz), 3.97 (1H, dd,  $J$  = 4.8, 2.1 Hz), 3.81–3.77 (1H, m), 3.72 (3H, s), 3.62–3.59 (5H, m), 3.50–3.39 (1H, m), 3.09–2.98 (1H, m), 1.75 (3H, s), 1.58–1.35 (2H, m), 1.28–1.15 (1H, m), 1.02–0.91 (1H, m). <sup>13</sup>C NMR (75 MHz, CDCl<sub>3</sub>)  $\delta$  163.2, 159.0, 150.2, 144.0 (d, <sup>3</sup>J<sub>PC</sub> = 4.4 Hz), 143.7, 140.5, 134.7, 130.8, 128.8, 128.7, 128.3, 127.6, 127.5, 127.3, 125.6, 125.6, 113.5, 102.2, 91.9 (d, <sup>2</sup>J<sub>PC</sub> = 11.9 Hz), 88.0, 87.6, 83.7, 82.5, 76.8, 73.3, 69.7 (d, <sup>2</sup>J<sub>PC</sub> = 12.8 Hz), 61.1, 58.9, 55.4, 46.7 (d, <sup>2</sup>J<sub>PC</sub> = 34.1 Hz), 30.4, 29.9, 25.9 (d, <sup>3</sup>J<sub>PC</sub> = 3.5 Hz). <sup>31</sup>P NMR (121 MHz, CDCl<sub>3</sub>)  $\delta$  159.1.

### (Rp)-U-Monomer [(Rp)-5].

5'-O-MMTr-2'-O-Me-uridine (0.53 g, 1.0 mmol) was dried by repeated coevaporations with pyridine and toluene and dissolved in freshly distilled THF (5.0 mL). Triethylamine (1.0 mL, 7.0 mmol) and a 0.4 M solution of the 2-

chloro-1,3,2-oxazaphospholidine derivative **D-3** in freshly distilled THF (5.0 mL, 2.0 mmol) were successively added at  $-78\text{ }^{\circ}\text{C}$ , and the mixture was stirred for 3 h at rt. The mixture was then diluted with  $\text{CHCl}_3$  (100 mL) and washed with a saturated  $\text{NaHCO}_3$  aqueous solutions ( $3 \times 100\text{ mL}$ ). The organic layer was dried over  $\text{Na}_2\text{SO}_4$ , filtered and concentrated under reduced pressure. The residue was then purified by silica gel column chromatography [NH silica gel, hexane–ethyl acetate–triethylamine (30:70:0.05, v/v/v)]. The fractions containing (*Rp*)-**5** were collected, washed with a saturated  $\text{NaHCO}_3$  aqueous solution (100 mL), dried over  $\text{Na}_2\text{SO}_4$ , filtered and concentrated to dryness under reduced pressure to afford (*Rp*)-**5** (0.38 g, 0.51 mmol, 51%) as a colorless foam.  $^1\text{H}$  NMR ( $\text{CDCl}_3$ )  $\delta$  8.21 (1H, d,  $J = 8.1\text{ Hz}$ ), 7.46–7.26 (17H, m), 6.87 (2H, d,  $J = 9.0\text{ Hz}$ ), 5.95 (1H, s), 5.23 (1H, d,  $J = 8.1\text{ Hz}$ ), 4.93–4.85 (1H, m), 4.27 (1H, d,  $J = 8.4\text{ Hz}$ ), 3.85–3.76 (5H, m), 3.65–3.53 (5H, m), 3.43–3.32 (1H, m), 3.08–2.95 (1H, m), 1.88 (3H, s), 1.59–1.39 (2H, m), 1.34–1.21 (1H, m), 1.01–0.90 (1H, m).  $^{13}\text{C}$  NMR (75 MHz,  $\text{CDCl}_3$ )  $\delta$  163.5, 159.1, 150.2, 144.0 (d,  $^3J_{\text{PC}} = 6.2\text{ Hz}$ ), 143.9, 143.7, 140.4, 134.7, 130.9, 128.8, 128.4, 128.3, 127.6, 127.5, 127.3, 126.9, 125.5, 125.4, 125.1, 113.5, 102.1, 92.2 (d,  $^2J_{\text{PC}} = 11.8\text{ Hz}$ ), 87.9, 87.6, 84.1, 81.7 ( $^2J_{\text{PC}} = 5.2\text{ Hz}$ ), 76.8, 73.3, 73.3, 68.9 ( $^2J_{\text{PC}} = 15.9\text{ Hz}$ ), 68.1, 60.2, 58.6, 55.5, 46.6 (d,  $^2J_{\text{PC}} = 33.8\text{ Hz}$ ), 30.4, 30.0, 29.7, 26.8, 26.0 (d,  $^3J_{\text{PC}} = 3.8\text{ Hz}$ ), 25.6.  $^{31}\text{P}$  NMR (121 MHz,  $\text{CDCl}_3$ )  $\delta$  159.8.

### **2'-O-Me-PB-ORN 2mers (9, 10).**

5'-*O*-DMTr-2'-*O*-Me-uridine-loaded HCP resin (0.5  $\mu\text{mol}$ ) via a succinyl linker was treated 3% DCA in  $\text{CH}_2\text{Cl}_2$  ( $4 \times 15\text{ s}$ ) (1 mL) for the removal of the 5'-*O*-DMTr group, washed with  $\text{CH}_2\text{Cl}_2$  ( $4 \times 1\text{ mL}$ ) and  $\text{CH}_3\text{CN}$  ( $3 \times 1\text{ mL}$ ) and dried *in vacuo*. Coupling reaction was performed by using a solution containing the corresponding nucleoside 3'-*O*-oxazaphospholidine monomer **5** (0.2 M) and CMMT **6** (1.0 M) in  $\text{CH}_3\text{CN}$  (0.1 mL) (3 min). After the condensation, the solid-support was washed with  $\text{CH}_3\text{CN}$  ( $3 \times 1\text{ mL}$ ) and  $\text{CH}_2\text{Cl}_2$  ( $3 \times 1\text{ mL}$ ) and dried *in vacuo*. The 5'-*O*-MMTr group and the chiral auxiliary were then removed by treatment with 1% TFA in  $\text{CH}_2\text{Cl}_2$  ( $4 \times 5\text{ s}$ ), (1 mL) and following washings with  $\text{CH}_2\text{Cl}_2$  ( $4 \times 1\text{ mL}$ ) and  $\text{CH}_3\text{CN}$  ( $4 \times 1\text{ mL}$ ) and dried *in vacuo*. The residue was treated with a mixture of DMAc (0.8 mL), BSA (0.1 mL) and  $\text{BH}_3 \cdot \text{S}(\text{CH}_3)_2$  (0.1 mL) at rt for 15 min, and the resin was successively washed with DMAc ( $4 \times 1\text{ mL}$ ),  $\text{CH}_3\text{CN}$  ( $4 \times 1\text{ mL}$ ) and dried *in vacuo*. The resin was then treated with a saturated solution of  $\text{NH}_3$  in EtOH (5 mL) at rt for 13 h. The resin was filtered off and washed with  $\text{H}_2\text{O}$  ( $5 \times 1\text{ mL}$ ). The filtrates were combined and concentrated to dryness under reduced pressure. The residue was analyzed by RP-HPLC.

### **A general procedure for manual solid-phase synthesis.**

5'-*O*-DMTr-2'-*O*-Me-uridine-loaded HCP resin (0.5  $\mu\text{mol}$ ) via a succinyl linker was treated 3% DCA in  $\text{CH}_2\text{Cl}_2$  ( $4 \times 15\text{ s}$ ) (1 mL) for the removal of the 5'-*O*-DMTr group, and washed with  $\text{CH}_2\text{Cl}_2$  ( $4 \times 1\text{ mL}$ ) and  $\text{CH}_3\text{CN}$  ( $3 \times 1\text{ mL}$ ) and dried *in vacuo*. Chain elongation was performed by repeating the following steps (i) and (ii). (i) Coupling reaction using a solution containing the corresponding nucleoside 3'-*O*-oxazaphospholidine monomer **5** (0.2 M) and CMMT **6** (1.0 M) in  $\text{CH}_3\text{CN}$  (0.1 mL) (3 min), and following washings with  $\text{CH}_3\text{CN}$  ( $3 \times 1\text{ mL}$ ) and  $\text{CH}_2\text{Cl}_2$  ( $3 \times 1$

mL) and dried *in vacuo*. (ii) removal of the 5'-O-MMTr group and the chiral auxiliary by treatment with 1% TFA in CH<sub>2</sub>Cl<sub>2</sub>-Et<sub>3</sub>SiH (1:1, v/v) (4 × 5 s) (1 mL), and subsequent washing with CH<sub>2</sub>Cl<sub>2</sub> (4 × 1 mL) and CH<sub>3</sub>CN (4 × 1 mL) and drying *in vacuo*. The resultant *H*-phosphonate oligonucleotides on the resin were converted to boranophosphate, phosphorothioate, or phosphoramidate oligonucleotides as described below.

#### **2'-O-Me-PB-ORN 4mers (11 and 12).**

The corresponding *H*-phosphonate oligonucleotide 4mer assembled on an HCP resin as above was treated with a mixture of DMAc (0.8 mL), BSA (0.1 mL) and BH<sub>3</sub>·S(CH<sub>3</sub>)<sub>2</sub> (0.1 mL) at rt for 15 min, and the resin was successively washed with DMAc (4 × 1 mL) and CH<sub>3</sub>CN (4 × 1 mL), and dried *in vacuo*. The resin was then treated with a saturated solution of NH<sub>3</sub> in EtOH (5 mL) at rt for 13 h. The resin was filtered off and washed with H<sub>2</sub>O (5 × 1 mL). The filtrates were combined and concentrated to dryness under reduced pressure. The residue was analyzed and characterized by RP-HPLC and MALDI-TOF-MS. **11**, 75% HPLC yield, MALDI-TOF-MS: Calcd. For [M-H]<sup>-</sup>; 1211.31. Found; 1211.61. **12**, 62% HPLC yield, MALDI-TOF-MS: Calcd. For [M-H]<sup>-</sup>; 1211.31. Found; 1211.70.

#### **2'-O-Me-PS-ORN 4mers (13 and 14).**

The corresponding *H*-phosphonate oligonucleotide 4mer assembled on an HCP resin as above was treated with a solution of 3-phenyl-1,2,4-dithiazoline-5-one (POS) (0.1 M) and BSA (0.5 M) in CH<sub>3</sub>CN (0.2 mL) at rt for 30 min, and the resin was washed with CH<sub>3</sub>CN (3 × 1 mL) and dried *in vacuo*. The resin was then treated with a 25% NH<sub>3</sub> aqueous solution-EtOH (5:1, v/v) (5 mL) at rt for 3 h. The resin was filtered off and washed with H<sub>2</sub>O (5 × 1 mL). The filtrates were combined and concentrated to dryness under reduced pressure. The residue was analyzed and characterized by RP-HPLC and MALDI-TOF-MS. **13**, 82% HPLC yield, MALDI-TOF-MS: Calcd. For [M-H]<sup>-</sup>; 1265.13. Found; 1265.52. **14**, 85% HPLC yield, MALDI-TOF-MS: Calcd. For [M-H]<sup>-</sup>; 1265.13. Found; 1265.52.

#### **2'-O-Me-PN-ORN 4mers bearing 2-dimethylaminoethylamino groups on the phosphorus atoms (15 and 16).**

The corresponding *H*-phosphonate oligonucleotide 4mer assembled on an HCP resin as above was treated with CCl<sub>4</sub>-2-dimethylaminoethylamine (9:1, v/v) (5 mL) at rt for 2 h, and the resin was washed with CH<sub>3</sub>CN (3 × 1 mL) and dried *in vacuo*. The resin was then treated with a 25% NH<sub>3</sub> aqueous solution-EtOH (4:1, v/v) (5 mL) at rt for 2 h. The resin was filtered off and washed with H<sub>2</sub>O (5 × 1 mL). The filtrates were combined and concentrated to dryness under reduced pressure. The residue was analyzed and characterized by RP-HPLC and MALDI-TOF-MS. **15**, 62% HPLC yield, MALDI-TOF-MS: Calcd. For [M+H]<sup>+</sup>; 1429.48. Found; 1427.61. **16**, 67% HPLC yield, MALDI-TOF-MS: Calcd. For [M+H]<sup>+</sup>; 1429.48. Found; 1428.89.

#### **2'-O-Me-PB-ORN 10mers (17 and 18).**

The corresponding *H*-phosphonate oligonucleotide assembled on an HCP resin as above was treated with a

mixture of DMAc (0.8 mL), BSA (0.1 mL) and  $\text{BH}_3 \cdot \text{S}(\text{CH}_3)_2$  (0.1 mL) at rt for 15 min, and the resin was successively washed with DMAc ( $4 \times 1$  mL),  $\text{CH}_3\text{CN}$  ( $4 \times 1$  mL) and dried *in vacuo*. The resin was then treated with a saturated solution of  $\text{NH}_3$  in EtOH (5 mL) at rt for 12 h. The resin was filtered off and washed with  $\text{H}_2\text{O}$  ( $5 \times 1$  mL). The filtrates were combined and concentrated to dryness under reduced pressure. The residue was purified and characterized by RP-HPLC and MALDI-TOF-MS. **17**, 5% isolated yield, LC-MS: Calcd. For  $[\text{M}-\text{H}]^-$ ; 3119.8. Found; 3119.7. **18**, 2% isolated yield, MALDI-TOF-MS: Calcd. For  $[\text{M}-\text{H}]^-$ ; 3119.8. Found; 3119.7.

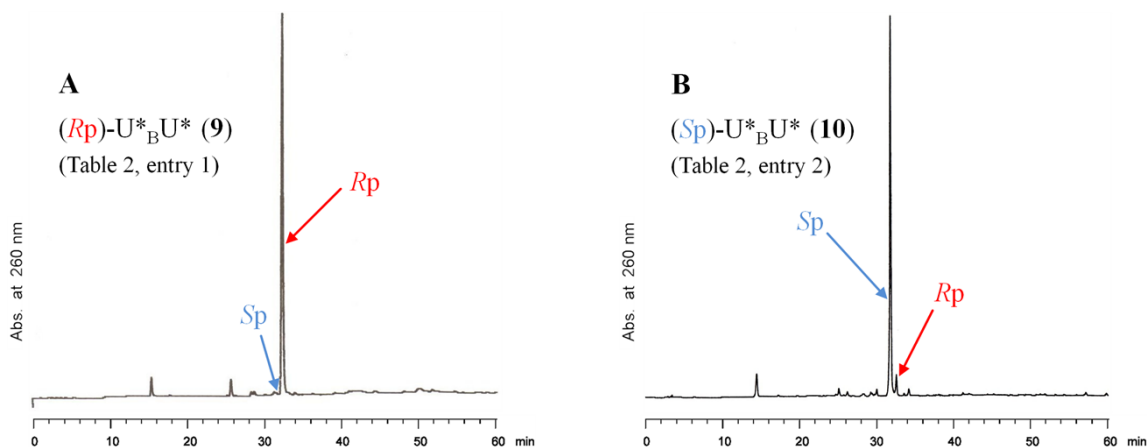

**Figure S1.** RP-HPLC profiles of crude **9** and **10** (Table 2, entries 1–2). RP-HPLC was performed with a linear gradient of 0–30%  $\text{CH}_3\text{CN}$  in 0.1 M TEAA buffer (pH 7.0) at 30 °C for 60 min at a rate of 0.5 mL/min.

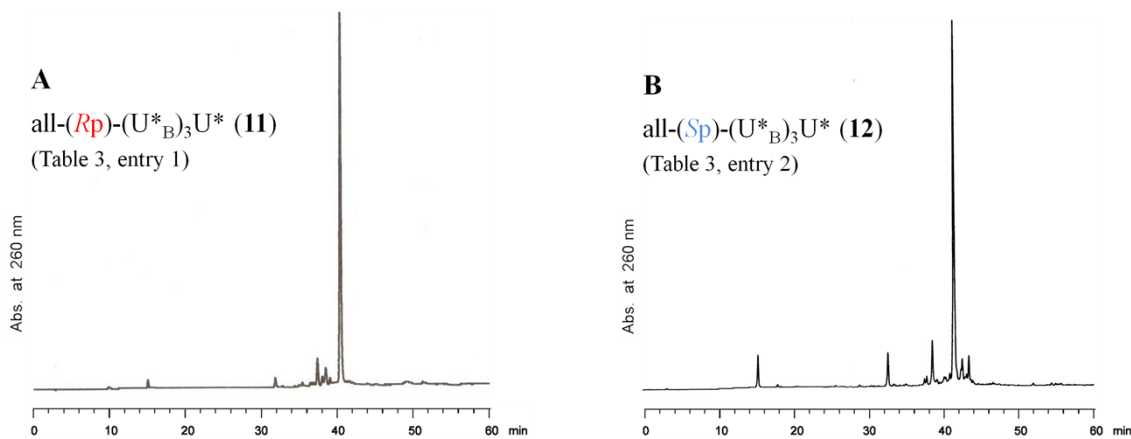

**Figure S2.** RP-HPLC profiles of crude **11** and **12** (Table 3, entries 1–2). RP-HPLC was performed with a linear gradient of 0–30%  $\text{CH}_3\text{CN}$  in 0.1 M TEAA buffer (pH 7.0) at 30 °C for 60 min at a rate of 0.5 mL/min.

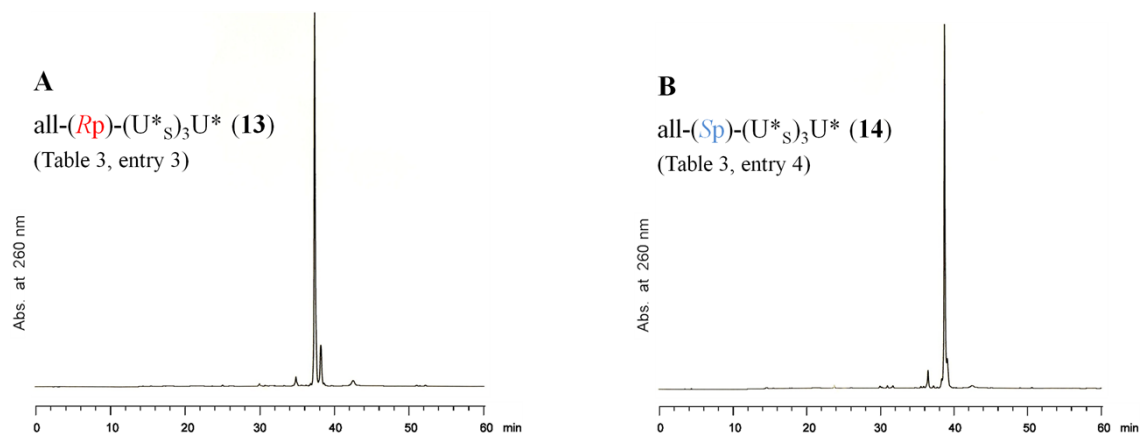

**Figure S3.** RP-HPLC profiles of crude **13** and **14** (Table 3, entries 3–4). RP-HPLC was performed with a linear gradient of 0–30% CH<sub>3</sub>CN in 0.1 M TEAA buffer (pH 7.0) at 30 °C for 60 min at a rate of 0.5 mL/min.

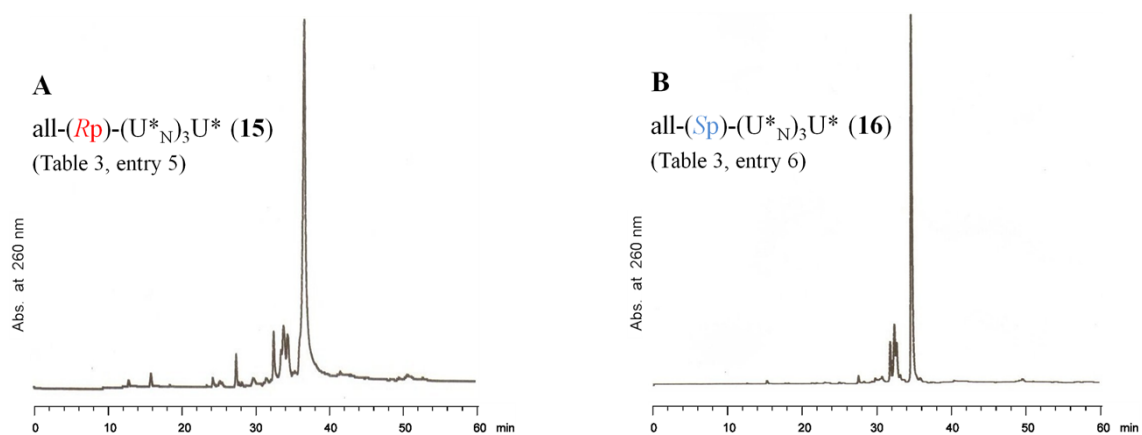

**Figure S4.** RP-HPLC profiles of crude **15** and **16** (Table 3, entries 5–6). RP-HPLC was performed with a linear gradient of 0–30% CH<sub>3</sub>CN in 0.1 M TEAA buffer (pH 7.0) at 30 °C for 60 min at a rate of 0.5 mL/min.

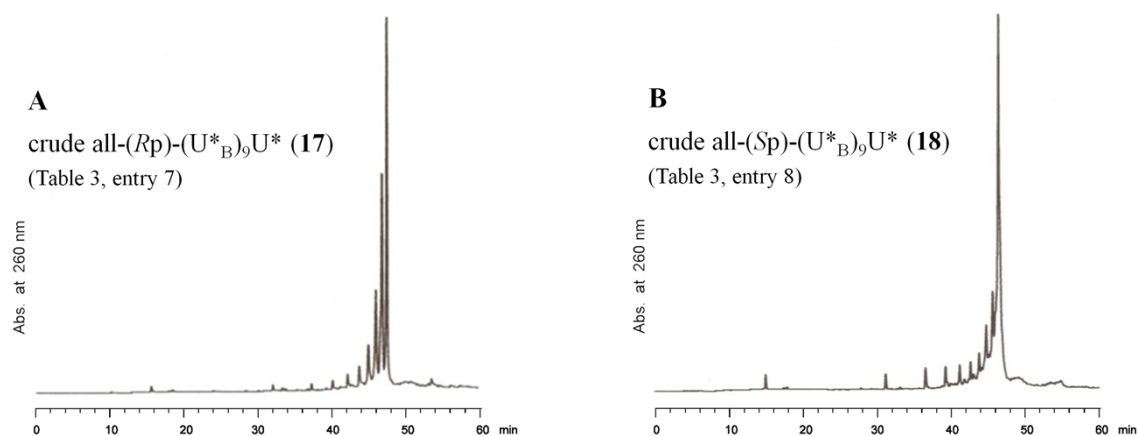

**Figure S5.** RP-HPLC profiles of crude **17** and **18** (Table 3, entries 7–8). RP-HPLC was performed with a linear gradient of 0–30% CH<sub>3</sub>CN in 0.1 M TEAA buffer (pH 7.0) at 30 °C for 60 min at a rate of 0.5 mL/min.

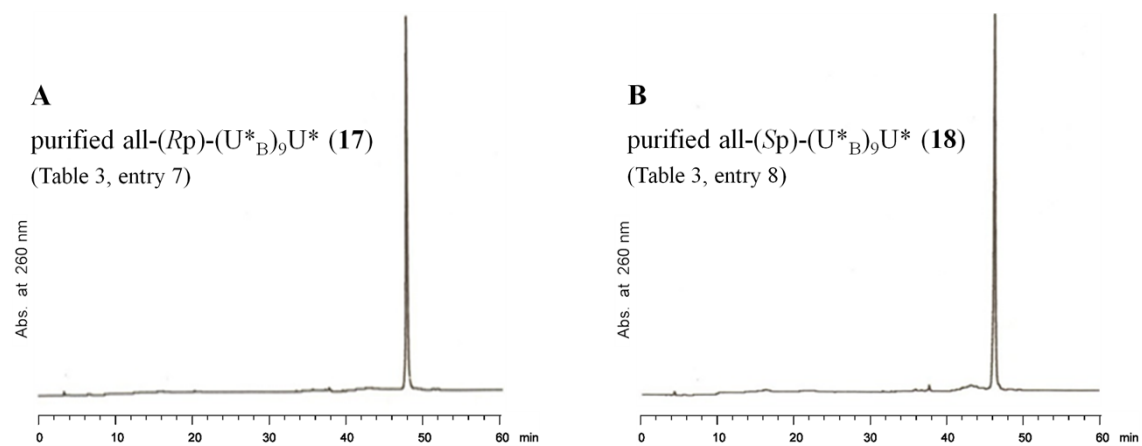

**Figure S6.** RP-HPLC profiles of purified **17** and **18** (Table 3, entries 7–8). RP-HPLC was performed with a linear gradient of 0–30% CH<sub>3</sub>CN in 0.1 M TEAA buffer (pH 7.0) at 30 °C for 60 min at a rate of 0.5 mL/min.

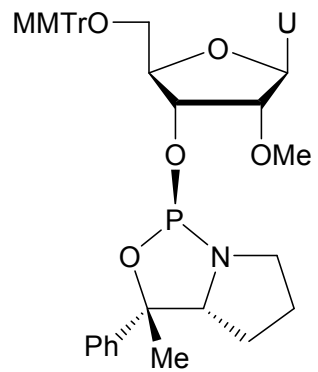

(Rp)-5

(<sup>1</sup>H, 300 MHz, CDCl<sub>3</sub>)

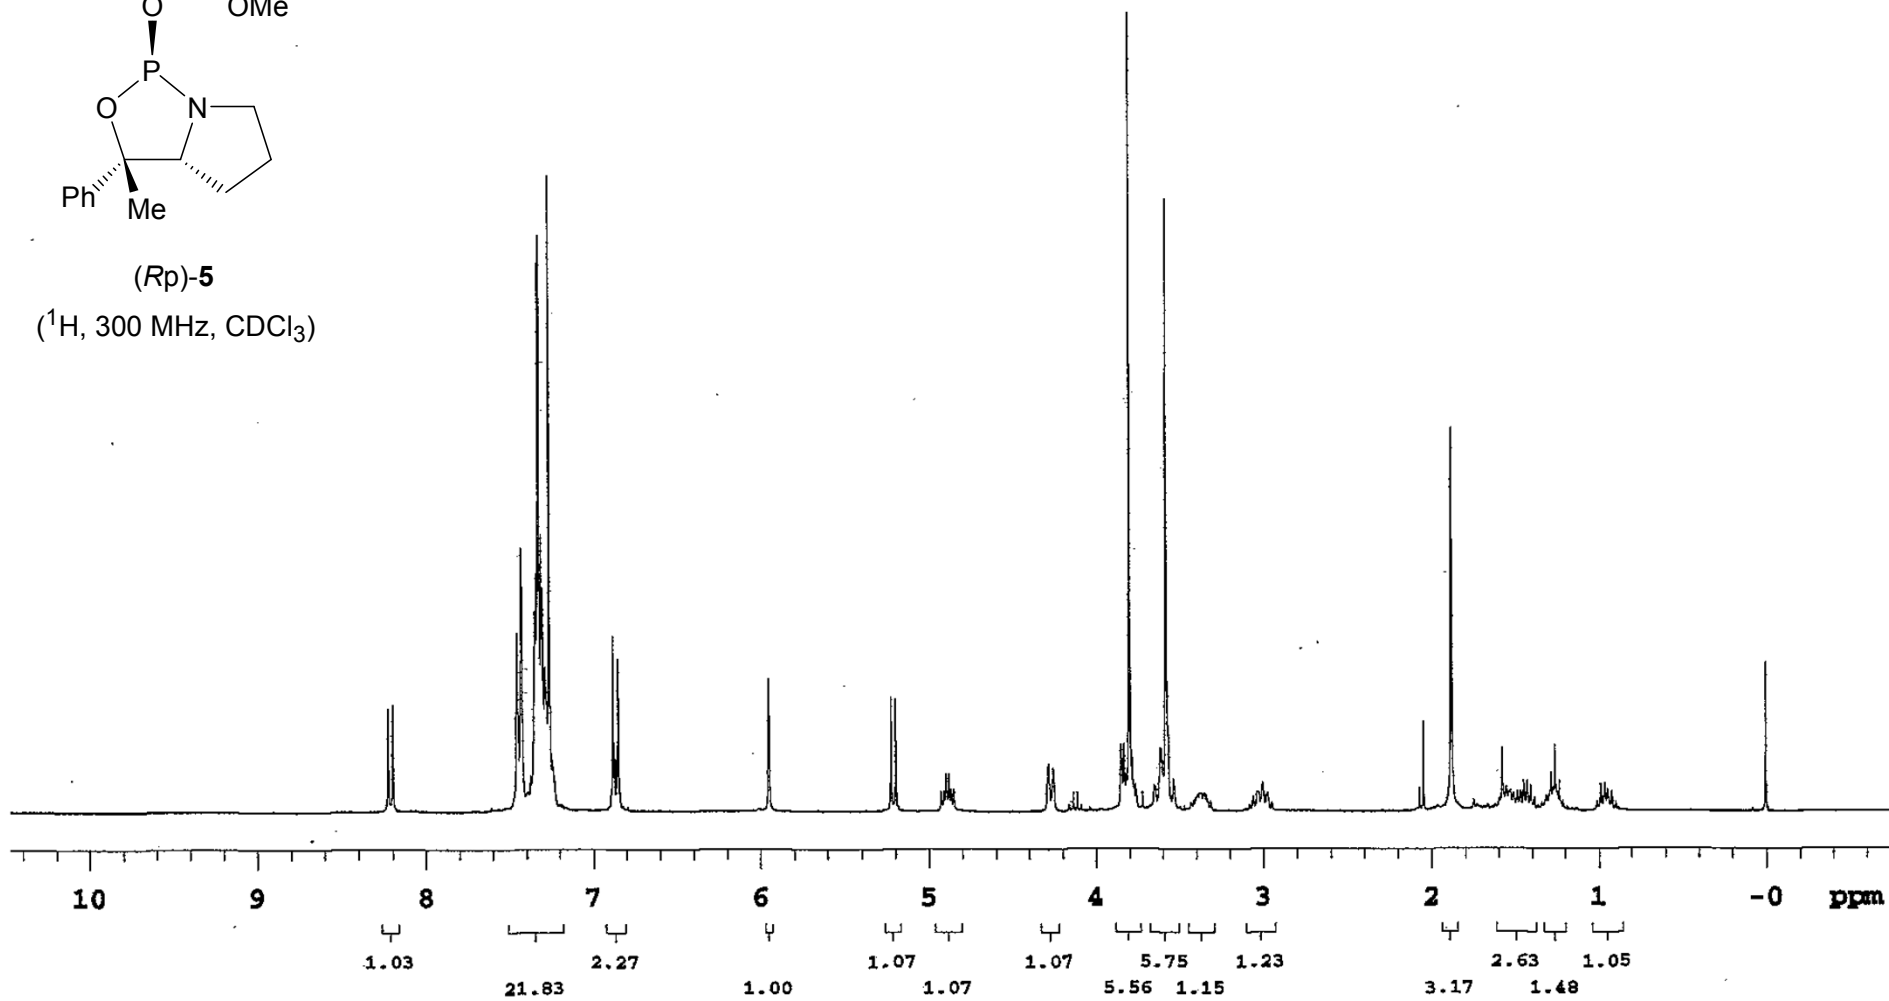



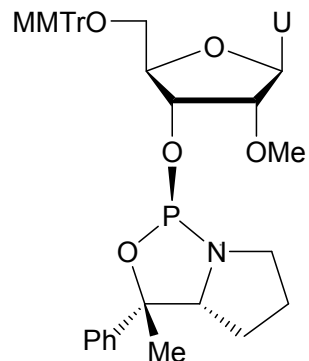

(*R<sub>p</sub>*)-5

(<sup>13</sup>C, 75 MHz, CDCl<sub>3</sub>)

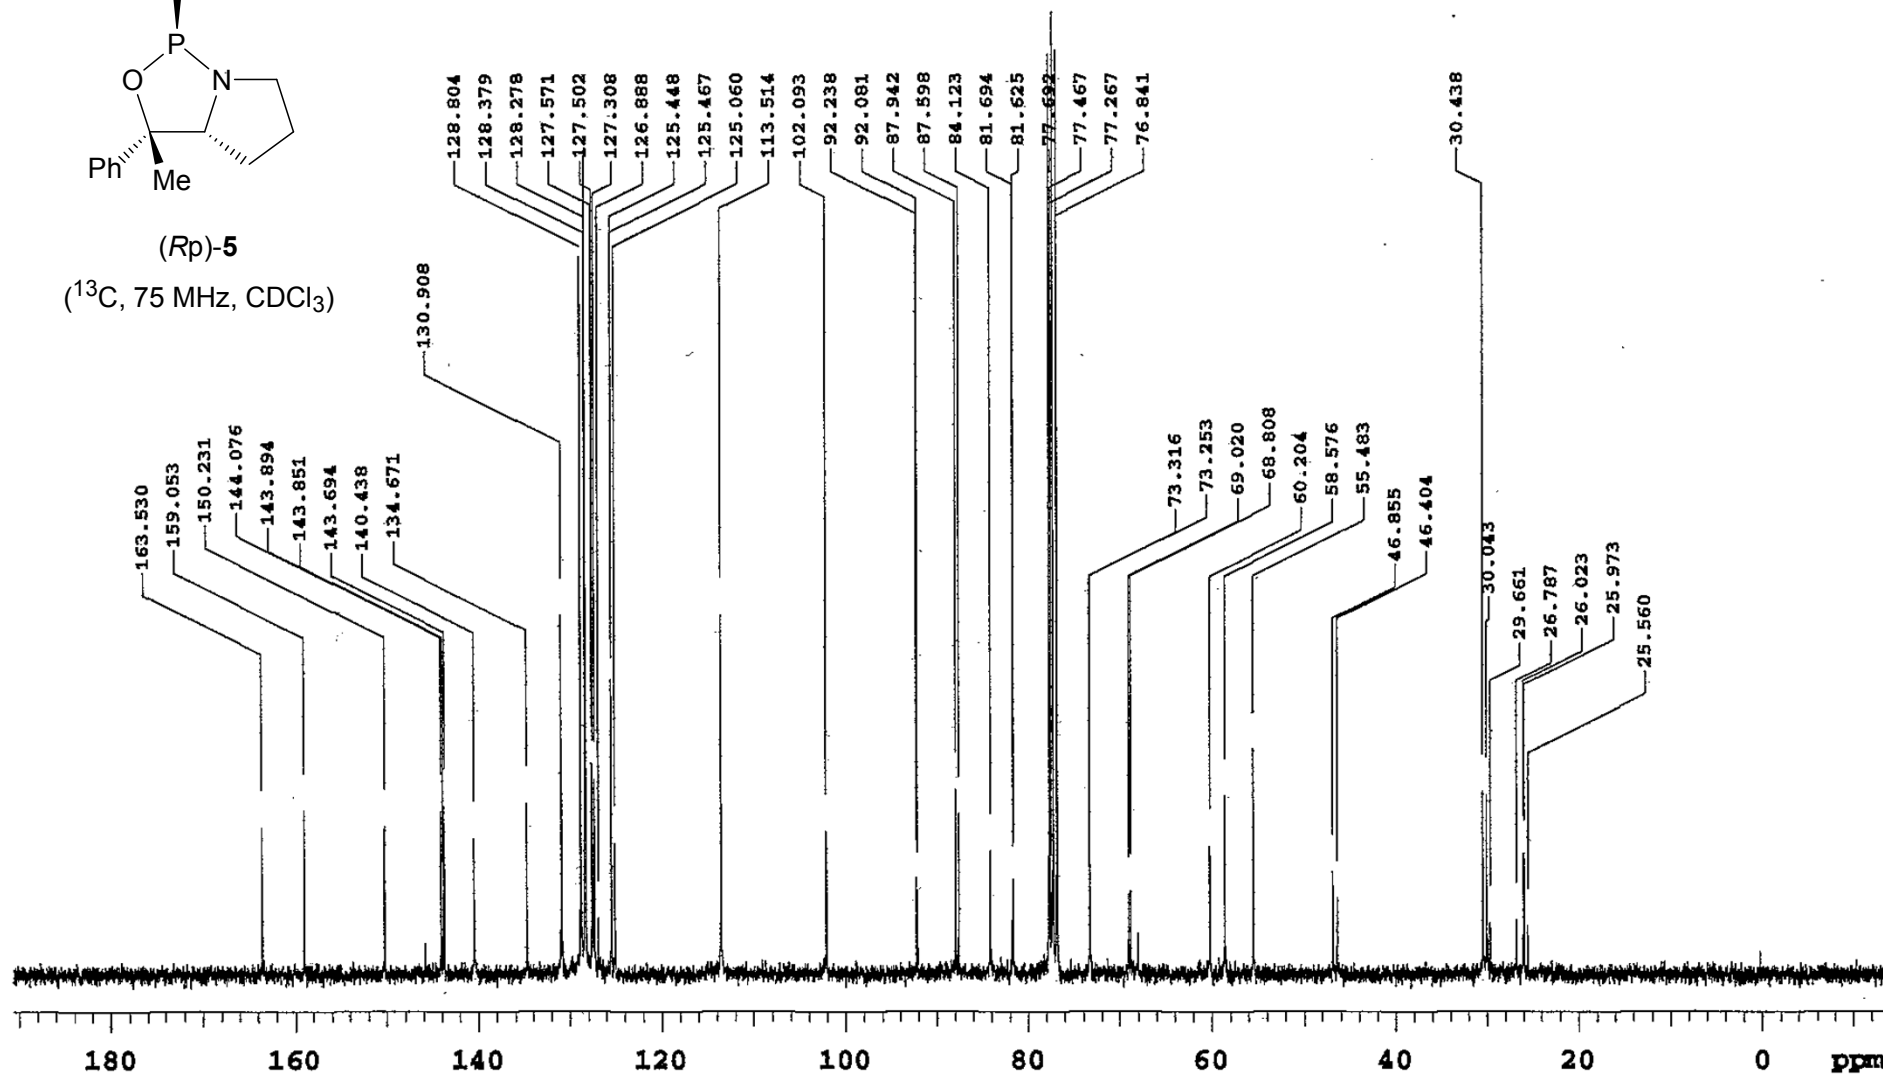

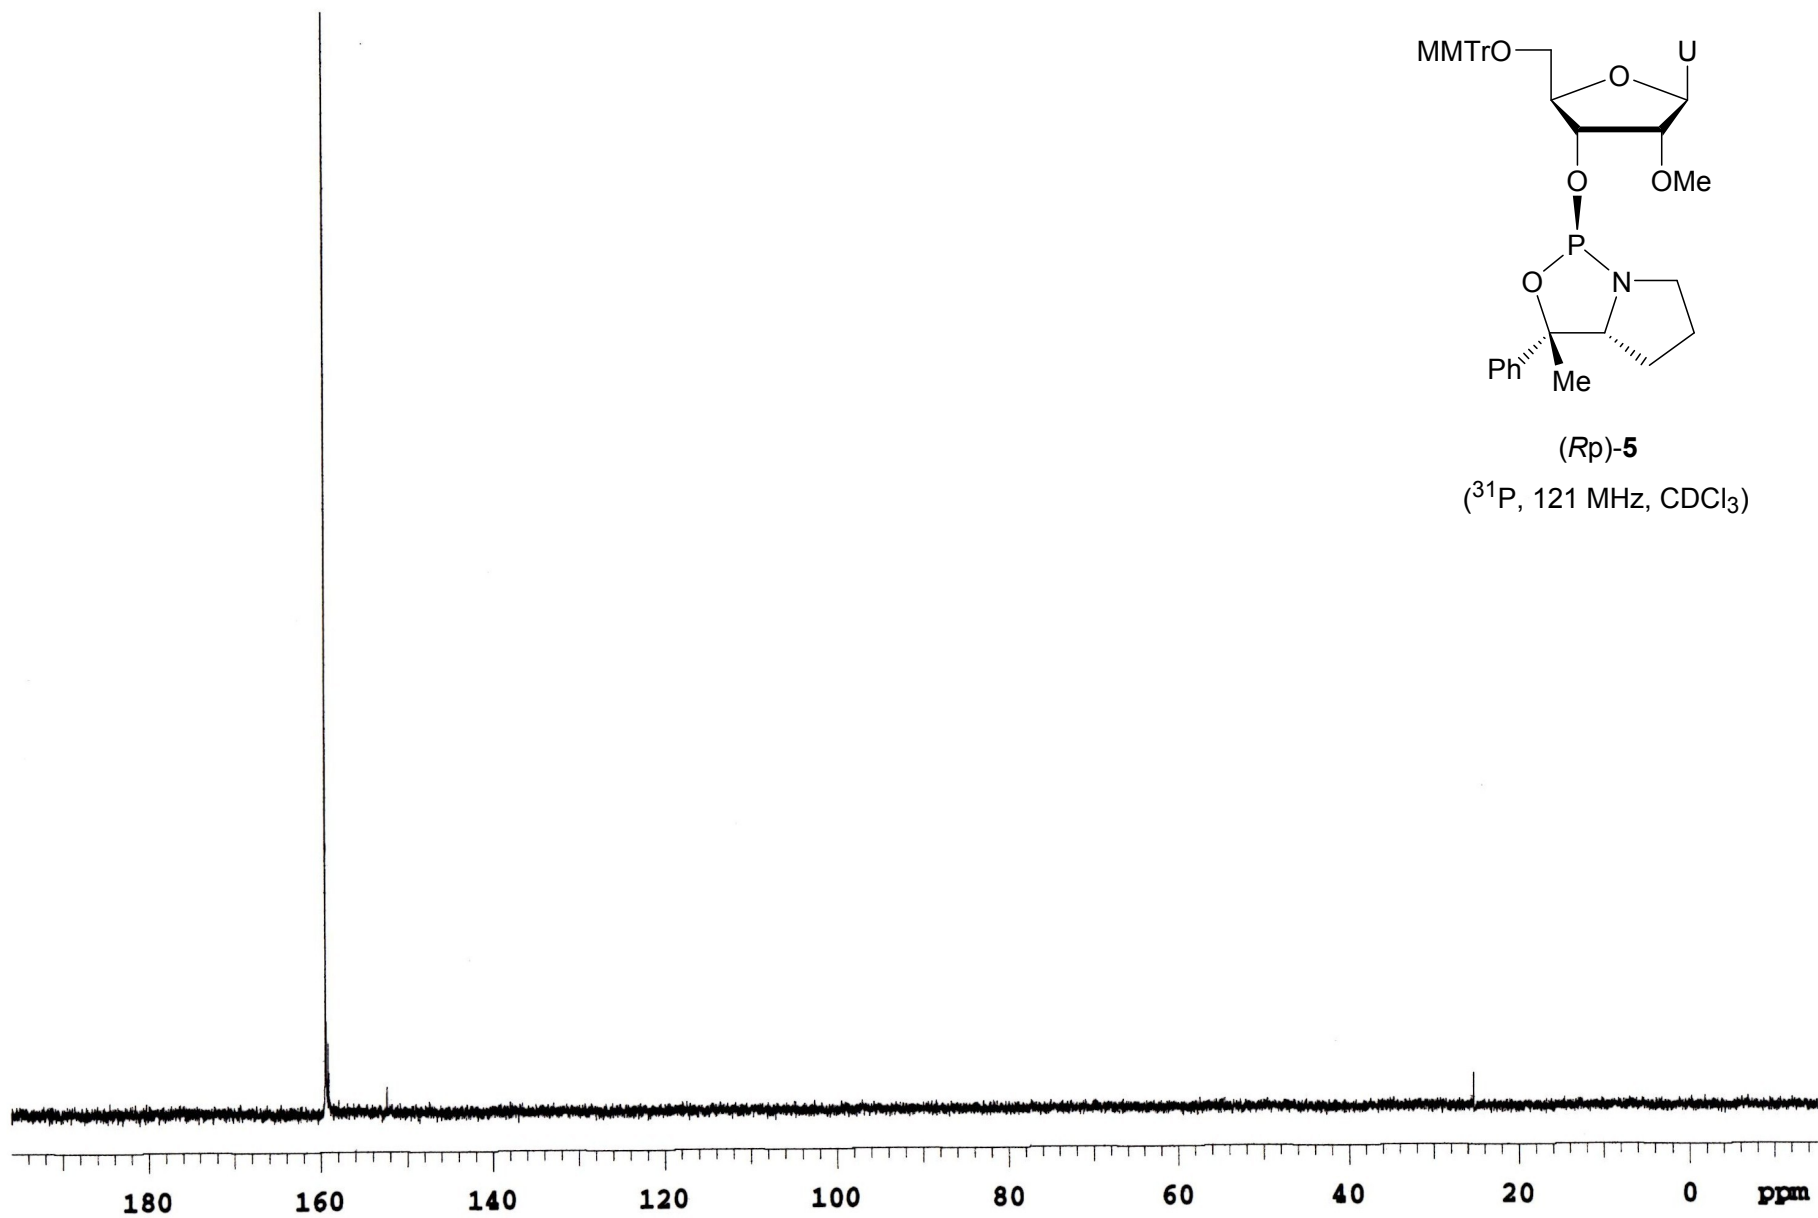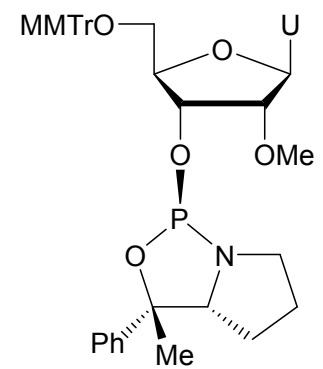

(Rp)-5

(<sup>31</sup>P, 121 MHz, CDCl<sub>3</sub>)

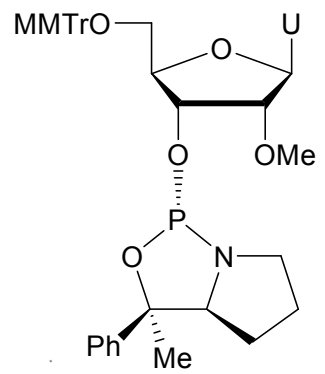

(Sp)-5  
 (<sup>1</sup>H, 300 MHz, CDCl<sub>3</sub>)

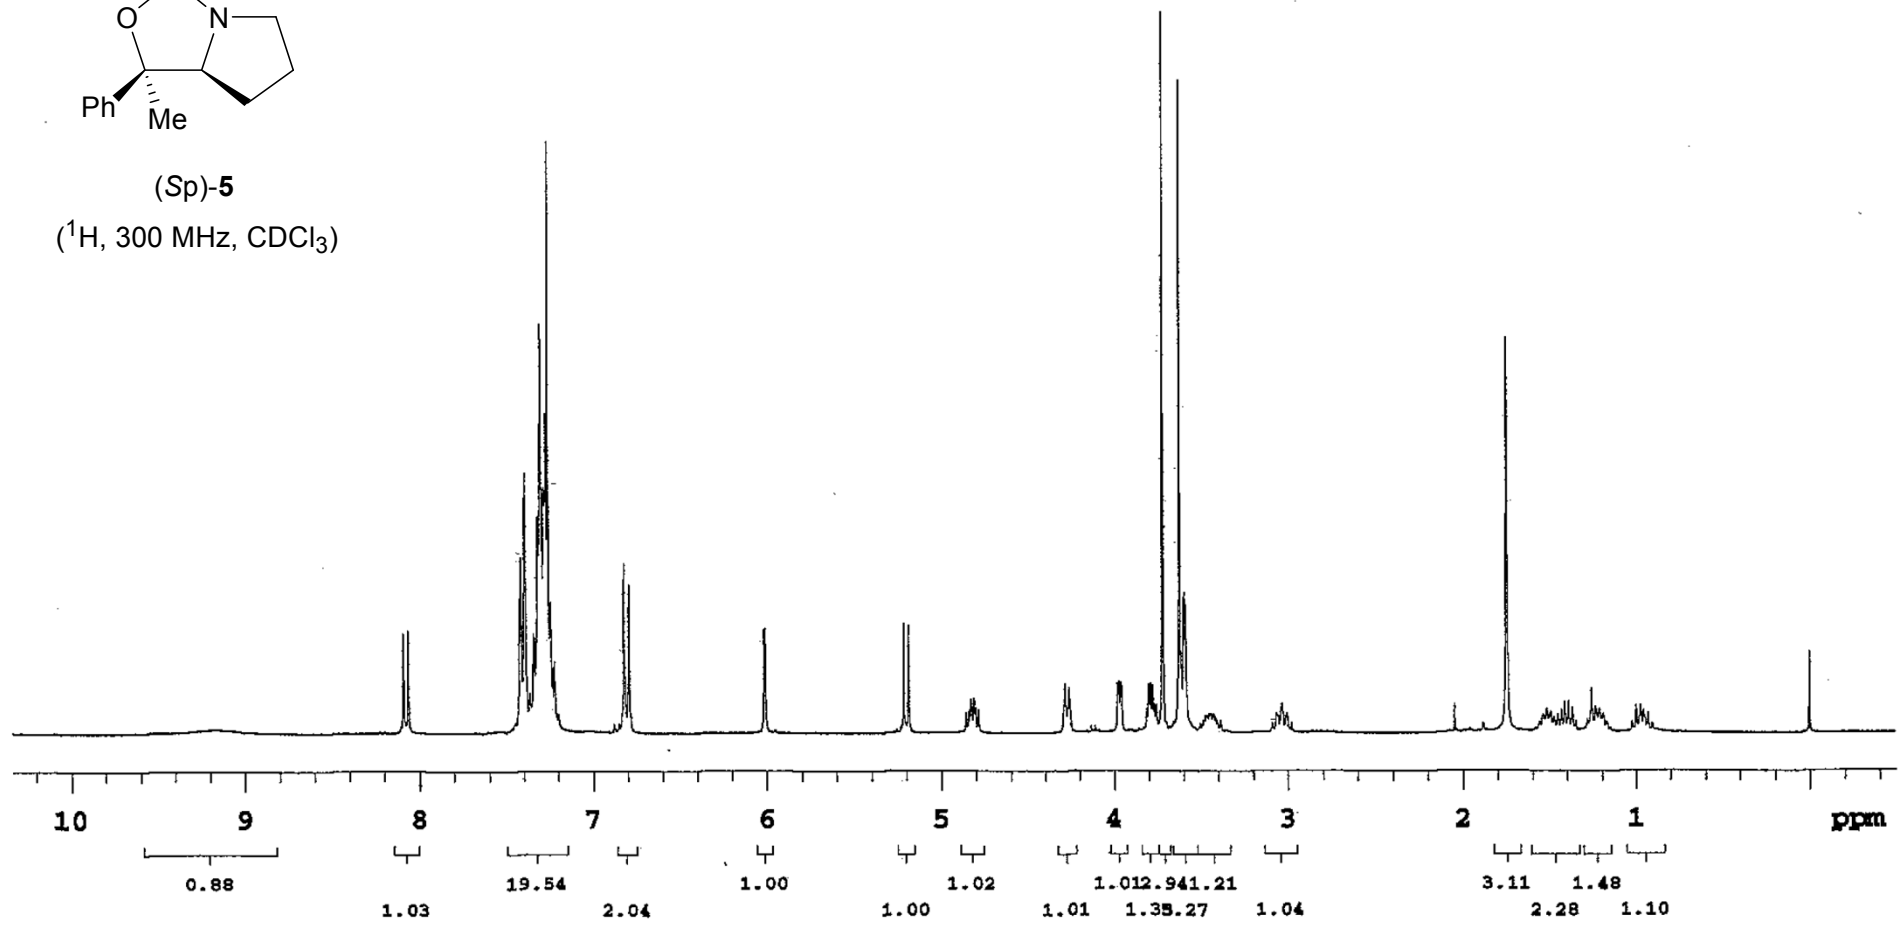

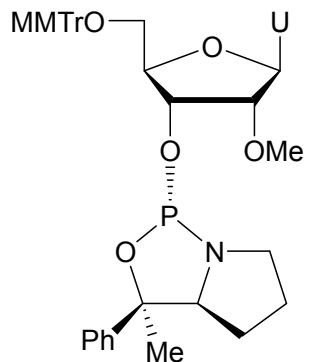

(Sp)-5

( $^{13}\text{C}$ , 75 MHz,  $\text{CDCl}_3$ )

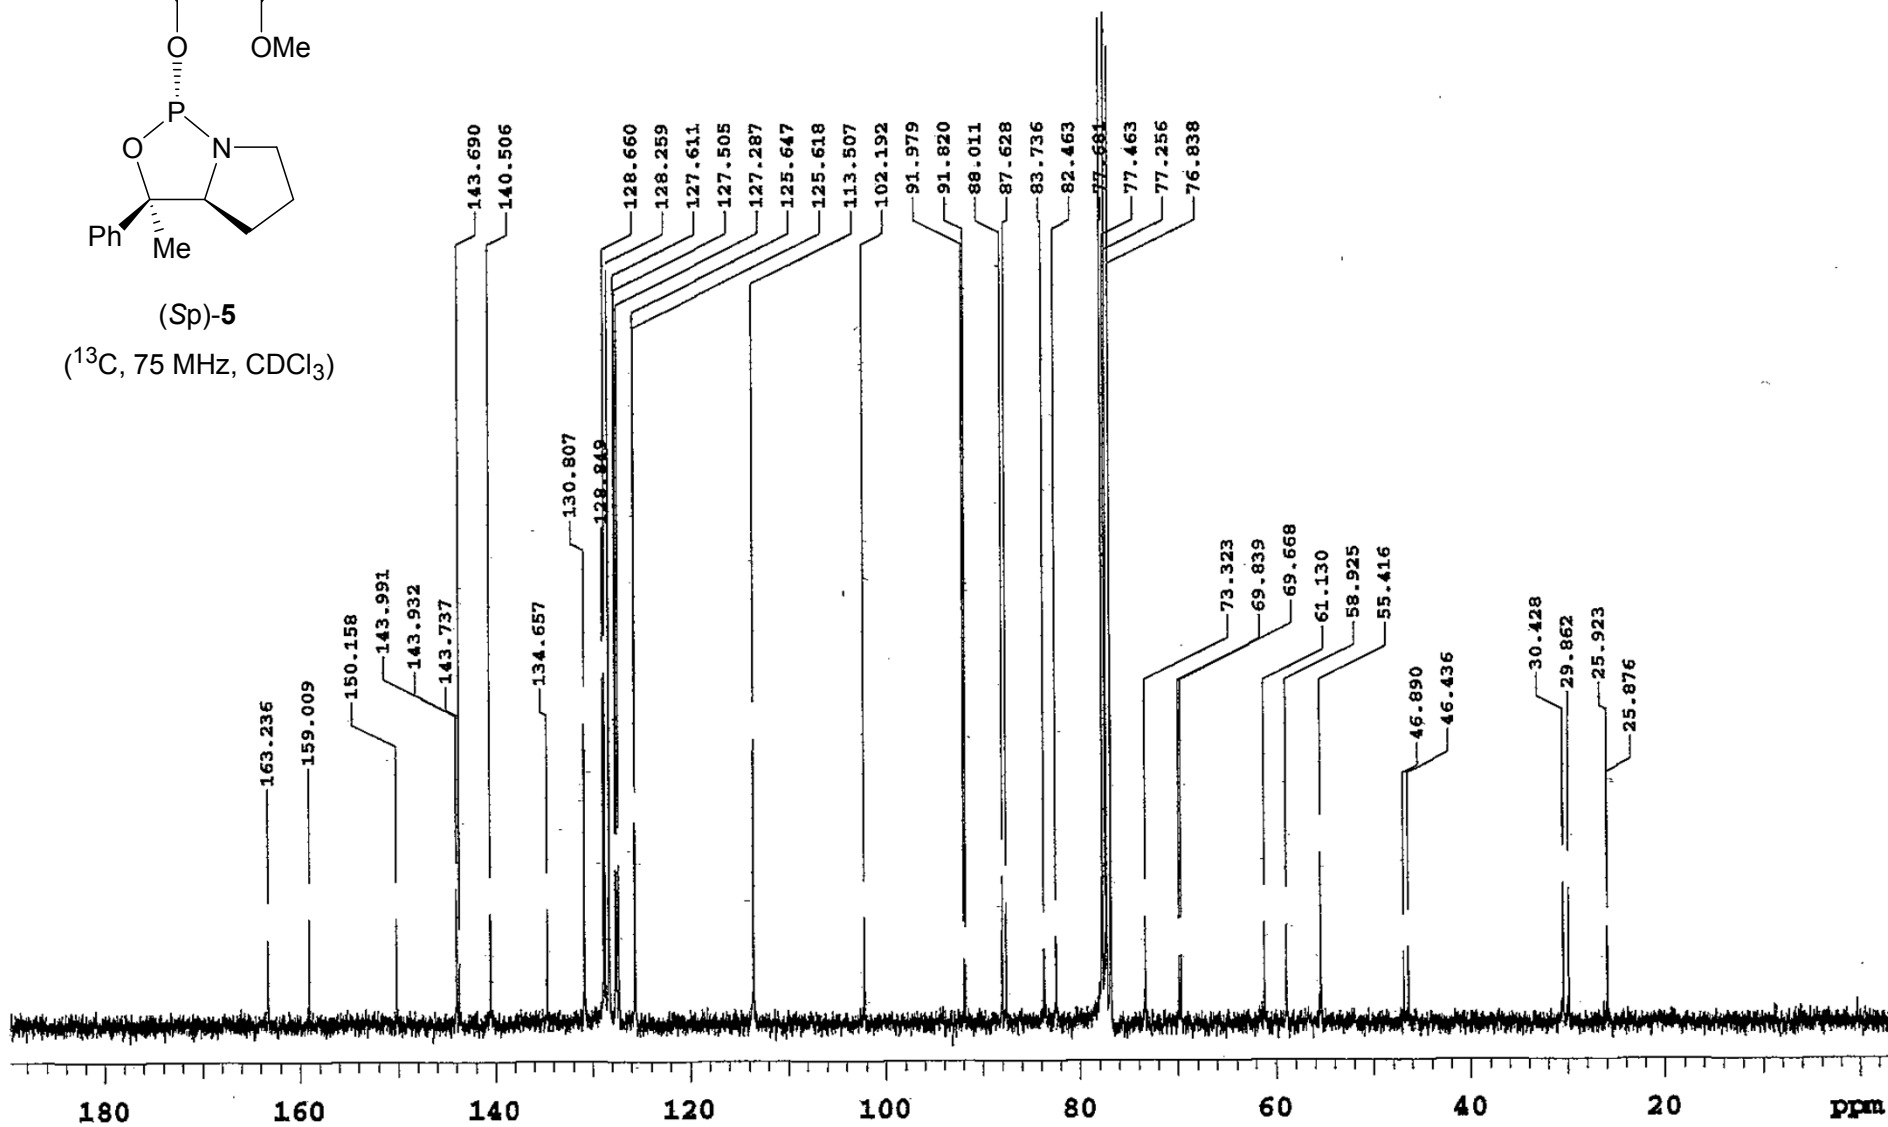

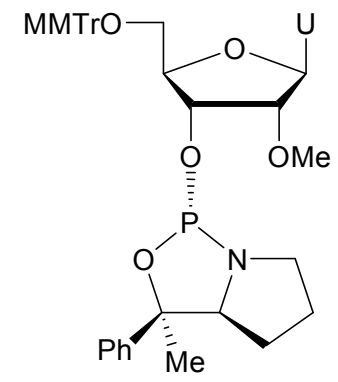

(Sp)-5

(<sup>31</sup>P, 121 MHz, CDCl<sub>3</sub>)

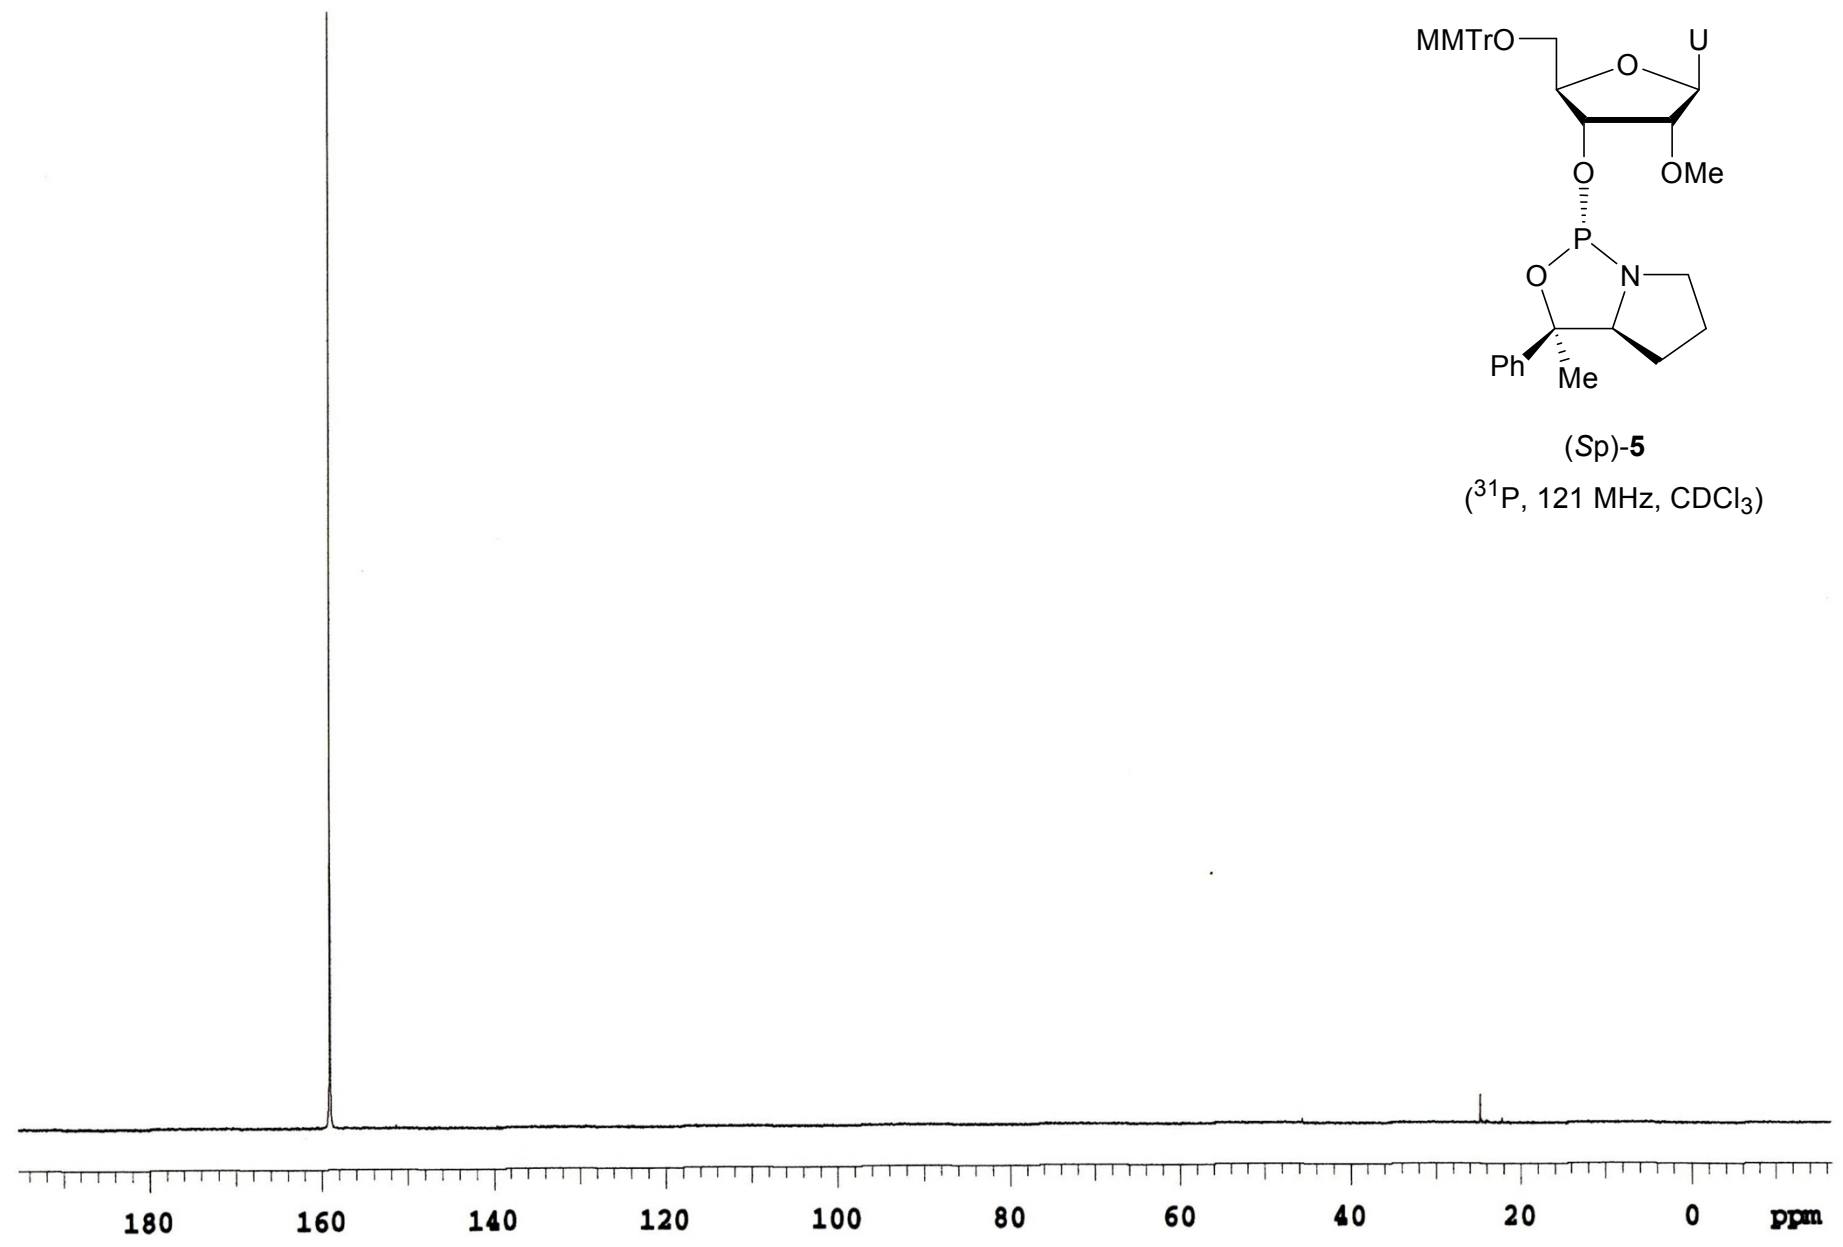

Supplement: c4ra11335g1.pdf [file c4ra11335g1.pdf]
